1 **A new test of value-modulated attentional bias in mice**

2

3 **Iasmina Horoiu, John Gigg & Deborah Talmi**

4

5 <sup>a</sup>Division of Neuroscience and Experimental Psychology, University of Manchester

6

7

8

9

10

11

12 **Address for correspondence**

13 Deborah Talmi, Division of Neuroscience and Experimental Psychology, School of Biological  
14 Sciences, University of Manchester, Manchester, UK, M139PL.

15 Telephone: 0161 275 1968

16 Email: [Deborah.Talmi@manchester.ac.uk](mailto:Deborah.Talmi@manchester.ac.uk)

17

## Abstract

18  
19  
20  
21  
22  
23  
24  
25  
26  
27  
28  
29  
30  
31  
32  
33  
34  
35  
36  
37  
38  
39  
40  
41  
42  
43  
44  
45  
46  
47  
48  
49  
50  
51  
52  
53  
54

The allocation of attention can be modulated by the emotional value of the stimulus. In order to understand the biasing influence of emotion on attention allocation further, we require an animal test of value-modulated attention capture evoked by ethologically valid stimuli. In mice, female odour triggers arousal and elicits emotional responses in males. Here, we determined the extent to which objects infused with female odour captured the attention of male mice. Seven experiments were conducted, using a modified version of the spontaneous Novel Object Recognition task. Attention was operationalised using differential exploration time of identical objects that were infused with female mouse odour (O+), infused with almond odour (Oa), or not infused with any odour (O-); and non-infused novel objects (X-). We found that when single objects were presented, as well as when two objects were presented simultaneously and thus competed with each other for attention, O+ captured attention preferentially compared to O-. This was the case both when O+ were placed in a novel location and when they were placed in a familiar location. When compared with Oa at novel location, O+ at familiar location attracted more attention. Compared to X-, O+ captured more attention only when they were placed in a novel location, but attention to O+ and X- was equivalent when they were placed in a familiar location. These results demonstrate that in mice, female odour can in some circumstances capture more attention than non-ethologically relevant olfactory stimuli and object novelty. The findings of this study pave the way to using motivationally-significant odours to modulate the cognitive processes that give rise to novel object recognition.

*Keywords:* attention, emotional arousal, memory, Novel Object Recognition task, olfactory stimuli

## Introduction

55

56

57 Emotional arousal influences cogitation extensively, from early perception, to attention (Golomb,  
58 Nguyen-Phuc, Mazer, McCarthy, & Chun, 2010; Pourtois, Schettino, & Vuilleumier, 2013), to higher  
59 order cognitive functions (Pessoa, 2009), including memory (Levine & Edelman, 2009; Talmi, 2013).

60 A central objective of human neuropsychological and neuroimaging research is to trace the  
61 neurobiological underpinnings of the link between emotional arousal and attention (Hartikainen,  
62 Ogawa, Soltani, & Knight, 2007; Kadohisa, 2013; Lee, Sakaki, Cheng, Velasco, & Mather, 2014;  
63 Talmi & McGarry, 2012; Vermeulen, Godefroid, & Mermillod, 2009). In line with this objective, the  
64 present study was designed to investigate the impact of an emotionally charged stimulus on attention  
65 allocation in mice. Establishing the means to measure such a link would provide a valuable animal  
66 task with which to further understand the neurobiology of emotional memory and attention.

67

68 Attention is crucial for the effective processing of perceptual information presented by the  
69 environment at any given time (Chun, Golomb, & Turk-Browne, 2011). Behaviourally-relevant  
70 stimuli are thought to be selected against others and prioritised via two routes: top-down and bottom-  
71 up (Corbetta, Patel, & Shulman, 2008; Miller & Cohen, 2001; Pratt & Hommel, 2003). Endogenous  
72 attentional control, also referred to as *goal-directed* or *top-down*, is a voluntary process that operates  
73 at the level of memory and decision making to modulate information according to the agent's  
74 intentions. In contrast, the exogenous, involuntary attentional capture by certain stimuli, known as  
75 *bottom-up* or *stimulus-driven attentional process*, depends on the physical characteristics of stimuli  
76 and is outside the agent's control. A recently proposed model, called Multiple Attention Gain Control  
77 (MAGiC), suggests a third route to attentional selection, through emotion. Emotion is thought to bias  
78 perception via distinct gain control mechanisms originating in the amygdala. Neuropsychological,  
79 neuroimaging and behavioural studies have provided evidence for the modulatory effects of emotion  
80 on sensory processing, whereby emotionally charged stimuli acquire increased representation and  
81 access to awareness compared to neutral stimuli (for review, see Pourtois et al., 2013). The majority  
82 of studies that informed the MAGiC model utilised threat-related stimuli, due to their obvious  
83 behavioural salience (Compton, 2003; Vuilleumier, 2005), as well as their role in various pathological  
84 conditions in humans, such as anxiety and phobias (Öhman & Mineka, 2001). However, in order to  
85 achieve a more complex understanding of the influence of emotion on the selection of sensory  
86 information, more research is needed on the effects of other emotional stimuli on attention, including  
87 those with positive value.

88

89 Stimuli that predict a valuable outcome – whether positive or negative - capture attention  
90 automatically, even when they are task-irrelevant (Anderson, Laurent, & Yantis, 2011; Wang, Duan,  
91 Theeuwes, & Zhou, 2014; Wentura, Müller, & Rothermund, 2014). This value-derived influence on

92 attention is neither top-down, nor bottom-up, since attention in this case is neither voluntarily directed  
93 by contextually relevant goals, nor driven by the sensory significance of the stimuli, respectively.  
94 Rather, attention is directed to stimuli that have acquired the potential to predict valuable outcomes  
95 via associative learning. This mechanism is referred to as *value-modulated attentional capture*  
96 (*VMAC*) (Le Pelley, Mitchell, Beesley, George, & Wills, 2016). While prioritising unexpected high-  
97 value stimuli might be biologically advantageous in certain situations, in others it could interfere with  
98 goal-directed behaviours. Further research is needed to offer a more in-depth understanding of the  
99 computational control of VMAC (Talmi, Slapkova, & Wieser, 2018).

100

101 The neural basis of top-down and bottom-up attention has been studied in detail in humans and in  
102 animal models. In humans, the majority of studies have been conducted on visual attention.  
103 Endogenous (top-down) signals arising in higher-order prefrontal, parietal and limbic cortices interact  
104 with exogenous (bottom-up) signals driven by visual cortical pathways to bias attention in favour of  
105 attended targets, while suppressing representations of unattended information (Desimone & Duncan,  
106 1995; Gitelman, 2003; Katsuki & Constantinidis, 2014). Across the literature, goal-directed  
107 attentional processing has been generally attributed to dorsal fronto-parietal brain areas, while  
108 stimulus-driven attentional control is believed to be mediated by ventral temporal-parietal networks  
109 (Anderson, Laurent, & Yantis, 2014; Corbetta & Shulman, 2002; Yantis et al., 2002). Animal studies  
110 of sustained attention, particularly in task-performing rats, have revealed the role of the cholinergic  
111 system in top-down, as well as bottom-up attentional control. The basal forebrain corticopetal  
112 cholinergic projections, which are activated via direct glutamatergic inputs from the prefrontal cortex  
113 to the basal forebrain, terminate in all cortical areas and are thought to mediate top-down processes in  
114 tasks involving sustained attention (McGaughy & Sarter, 1998; Sarter, Givens, & Bruno, 2001;  
115 Zaborszky, Gaykema, Swanson, & Cullinan, 1997). Lesions of the basal forebrain, affecting inputs of  
116 acetylcholine particularly in fronto-dorsal cortical areas of rat models of attention, result in prolonged  
117 impairments of sustained attention (Sarter et al., 2001). Bottom-up attentional processes have been  
118 shown to largely depend on noradrenergic projections, which originate in the locus coeruleus and  
119 terminate in the thalamus and the basal forebrain. Noradrenergic activation of basal forebrain  
120 corticopetal projections is involved in the processing of threat-related or anxiety-inducing stimuli in a  
121 bottom-up fashion via the recruitment of telencephalic systems (Aston-Jones, Rajkowski, Kubiak,  
122 Valentino, & Shipley, 1996; Sarter et al., 2001). So far, these animal studies have demonstrated that  
123 the basal forebrain cortical cholinergic system represents a core component of the neuronal circuitry  
124 involved in attentional processing, thus contributing to the understanding of the role of the fronto-  
125 parietal cortical regions from human neuropsychological and imaging research. Integrating evidence  
126 from human and animal works is necessary for the development of a reliable model of the neural  
127 mechanisms of attention.

128

129 The neural basis of VMAC has been less well understood in animal models. In humans, Anderson et  
130 al. (2014) argue that the neural mechanisms underlying VMAC are mediated by the tail of the caudate  
131 nucleus and the extrastriate visual cortex. Using functional magnetic resonance imaging (fMRI), these  
132 researchers found that task-irrelevant reward-predictive stimuli acting as distractors acquired stronger  
133 representation in the caudate tail and triggered greater activity in the extrastriate visual cortex versus  
134 other non-target stimuli. So far, animal models of attention using stimuli with emotional value have  
135 been derived from the traditional theories of associative learning and conditioning. In one model of  
136 associative learning, proposed by Mackintosh (1975), animals pay more attention to cues that are  
137 reliable predictors of a consequence (high predictiveness) than to non-predictive cues. Selective  
138 attentional bias towards good predictors allows animals to focus on relevant cues, while ignoring  
139 distractors, thereby achieving optimal performance. In contrast, the model by Pearce and Hall (1980)  
140 states that cues with uncertain consequences capture the most attention. The idea behind this model is  
141 that because unreliable cues are surprising, they will be allocated more attentional resources that leads  
142 to rapid learning about their significance. While there is abundant evidence in favour of both  
143 predictability (Duffaud, Killcross, & George, 2007; George & Pearce, 1999) and uncertainty (Kaye &  
144 Pearce, 1984; Wilson, Boumphrey, & Pearce, 1992) models, several hybrid models have emerged in  
145 an attempt to reconcile these principles (for reviews, see Esber & Haselgrove, 2011; Le Pelley et al.,  
146 2016). To date, very little, if any, data exist on the influence of biologically relevant stimuli on  
147 VMAC in rodents. The present study is, to our knowledge, the first research using female odours to  
148 examine VMAC in a rodent model of attention.

149  
150 Unlike humans, who are predominantly influenced by visual stimuli (Shapiro, Egerman, & Klein,  
151 1984), most mammals, including rodents, rely mainly on odours to obtain information about their  
152 environment (Brennan & Kendrick, 2006; Johnston, 2003). Odours from conspecifics of opposite sex  
153 are thought to carry positive reward values, because they elicit an approach response to promote  
154 reproductive behaviours, as opposed to withdrawal or avoidance responses, which suppress  
155 reproductive behaviours (Beny & Kimchi, 2014). The motivational significance of odours bearing  
156 reproductive value does not seem to depend on the animal's prior sexual experience; these stimuli  
157 can, therefore, be considered primary reinforcers. This is evident in the laboratory, where sexually  
158 inexperienced male rodents display typical sexual behaviours when exposed to female odours (Beny  
159 & Kimchi, 2014). Given the socio-biological relevance of odours and their known motivational  
160 effects on animals, it is reasonable to assume that odours could be used as stimuli to investigate  
161 VMAC in an animal model.

162  
163 Seven experiments were designed to quantify the degree of attention allocation in male mice to  
164 objects infused with female odour (O+). We contrasted the O+ objects with odour-neutral objects (O-  
165 ), novel objects (X-) and objects infused with almond extract (O<sup>a</sup>), a mildly attractive odour for

166 rodents (Huckins, Logan, & Sanchez-Andrade, 2013). These objects were used in a modified version  
167 of the spontaneous Novel Object Recognition (NOR) task. NOR is one of the most widely used  
168 paradigms in studies of memory functions in rodents. The NOR task can be configured to measure  
169 attention (Silvers, Harrod, Mactutus, & Booze, 2007) and has been used in studies focusing on  
170 pathological conditions or drug abuse, which result in attentional deficits (Alkam et al., 2011; Piper,  
171 Fraiman, & Meyer, 2005). Originally developed by Berlyne (1950) and subsequently adapted for use  
172 in mice by Murai *et al.* (2007), this behavioural task relies on the drive of rodents to explore novelty  
173 in the absence of any training or external reinforcers. The original NOR task comprises three phases:  
174 habituation, familiarisation and test. In the first two phases, the animal is exposed to an open-field  
175 arena (habituation) and then to the same arena in the presence of two identical objects  
176 (familiarisation). The test phase is similar to the familiarisation phase, with the exception that one of  
177 the identical objects is replaced with a novel object. Healthy adult rodents recognise the familiar  
178 object at test and pay more attention to the novel (more arousing) object, indicated by a longer  
179 exploration time of the novel versus familiar object (Ennaceur, 2010; Gaskin et al., 2010; Mumby,  
180 Glenn, Nesbitt, & Kyriazis, 2002). In the modified NOR paradigm used in this study, instead of novel  
181 and familiar objects, the attention allocation of male mice was investigated for O+ versus O-, O<sup>a</sup> or X-  
182 , which were placed in either novel or familiar locations in a Y-maze.

183

184 The first two experiments assessed the attentional capture of mice by an O+ compared with an O,  
185 when both objects were novel (Experiment 1) or familiar (Experiment 2). We hypothesised that  
186 because the motivational value of O+ was higher than of O-, the former would attract more attention  
187 in both experiments. We then asked whether the same would be true if O+ and O- were placed at  
188 different locations in the arena, so that O+ would be found at either a novel (Experiment 3) or a  
189 familiar (Experiment 4) location. In these experiments, novel location was used due to its previously  
190 demonstrated influence on attention (Ennaceur, Neave, & Aggleton, 1997) and, thus, it was  
191 interesting to study how well novel location competed with female odour for attention allocation. We  
192 hypothesised that when the location of O+ was novel, O+ would capture more attention than O-,  
193 because the former benefited from the advantage of two salient motivational features, namely,  
194 motivational value and novel location. However, in Experiment 4 it was less clear whether O+ would  
195 still 'win' over O-, due to the fact that the novel location of the latter was now competing with the  
196 odour of the former for attention. In the next two experiments, we used another well-known  
197 motivational feature, novel object identity, and assessed how strong the attention capture by odour  
198 was when competing with a novel object (X-). Novel objects are expected to recruit more attention  
199 than familiar objects in the traditional NOR task and, therefore, we were interested to test how  
200 attention to O+ would be influenced by the presence of X-. Experiment 5 tested the attention captured  
201 by O+ at a novel location versus an X- at a familiar location. Here, O+ had the advantage of odour  
202 and location novelty, while X- had the advantage of novel identity. In Experiment 6, X- was placed at

203 a novel location and O+ at a familiar location. Since this time X- had the advantage of both novel  
204 identity and novel location, the question was whether it would attract more attention than O+.

205

206 There is preliminary evidence that social odour captures more attention in mice compared to non-  
207 social odours. Rattazzi, Cariboni, Poojara, Shoenfeld, & D'Acquisto (2015) compared female mouse  
208 odour and other social odours to non-social odours in male mice of a similar strain to the ones used  
209 here, and which were obtained from the same provider. They found that control mice, as well as  
210 immune-cell deficient recombination-activating gene (RAG-1) knockout mice, showed increased  
211 sniffing time for the former. Therefore, in Experiment 7, we wanted to compare the degree to which  
212 objects infused with female odour attracted more attention than objects infused with another odour  
213 with a lower level of motivational significance.

214

215 In their study on the effects of odour preferences on rats' discrimination learning, Devore, Lee, &  
216 Linster (2013) classified 53 monomolecular odorants as *high*, *neutral* and *low*, in terms of  
217 spontaneous odour preferences. By contrast, the odour of flowers, nuts and fruit is a mixture of  
218 compounds. For the purposes of our study, instead of single chemical compounds, we decided to use  
219 the odour from a compound mixture (such as a flower, nut or fruit), because such odours are prevalent  
220 in behavioural studies of mice (Arbuckle, Smith, Gomez, & Lugo, 2015; Rattazzi, Cariboni, Poojara,  
221 Shenfeld, & D'Acquisto, 2015; Yang & Crawley, 2010). We selected almond odour, one of those  
222 used by Rattazzi et al. (2015). According to (Huckins, Logan, & Sanchez-Andrade, 2013), unlike  
223 conspecific urine smell, which is a 'social odour' and, therefore, high in motivational significance, the  
224 odour of almond extract is mildly motivationally significant, since it is a natural food odour but  
225 distinct from the food laboratory mice are used to. This type of odour can be employed as a neutral  
226 non-social odour alongside social odours in rodent experiments investigating odour-mediated  
227 behaviour and odour identification ability (for instance, when testing deficits in identifying pleasant or  
228 neutral odours in rodent models of psychiatric diseases, Huckins, Logan, & Sanchez-Andrade, 2013).  
229 We predicted that despite the mild motivational significance of almond odour, animals in Experiment  
230 7 will allocate more attention to female mouse odour.

231

232 In Experiment 7b attention allocation to O+ at a familiar location was compared to attention  
233 allocation to O<sup>a</sup> at a novel location. Here, O+ had the advantage of motivational significance, while O<sup>a</sup>  
234 benefited from two factors, namely location novelty and a mildly attractive odour. This experiment  
235 compared the attentional draw of two different odours, in contrast with the previous two experiments,  
236 which compared an olfactory stimulus with visual stimuli. Similar to Experiments 5 and 6, in this last  
237 experiment it was interesting to observe which object feature combinations captured more attention  
238 and whether O+ can still elicit more interest.

239



240 Unlike previous research which used social and non-social odours to look at the animal's capacity to  
241 distinguish between the two and to investigate habituation/dishabituation (Arbuckle, Smith, Gomez,  
242 & Lugo, 2015; Yang & Crawley, 2010), or to test altered sense of smell in certain conditions  
243 (Rattazzi, Cariboni, Poojara, Shenfeld, & D'Acquisto, 2015), our study focused on quantifying the  
244 attentional capture by a social odour and provided a reliable protocol for future studies using NOR in  
245 such behavioural assessments.

246

247

## Methods

248

### 249 **Animals**

250 Behavioural experiments were performed using eight adult male C57BL/6J mice (Charles River, UK),  
251 which were 14 weeks (3.5 months) old at the start of the experiments and weighed  $30\pm 3$  g throughout  
252 the project. Mice were weighed prior to each experiment and at the end of the last experiment on a  
253 laboratory scale (Kern FCB, Germany). Mice were maintained by the Biological Services Facility  
254 (BSF), University of Manchester, UK and housed in groups of four individuals in ventilated  
255 Techniplast cages, in standard conditions ( $20\pm 2^\circ\text{C}$  temperature and  $55\pm 5\%$  humidity) on a 12:12  
256 light/dark cycle, with *ad libitum* access to food and water. All mice were ear punched for  
257 identification. The experiments were carried out over a period of two months and took place between  
258 9:30am-12:30pm. All procedures were conducted in conformity with the University of Manchester  
259 BSF regulations for animal husbandry and with the Home Office Animals (Scientific Procedures) Act  
260 (1986) and were licenced by the UK Home Office and University of Manchester Ethical Review  
261 Panel.

262

### 263 **Apparatus**

264 Experiments were performed in custom Y-mazes with three identical white, opaque plastic arms,  
265 (length 160mm, height 280mm) diverging at a  $120^\circ$  angle from each other (designed by Jack Rivers-  
266 Auty and constructed by Plastic Formers Ltd, UK). Each arm became wider at the end to form a small  
267 square arena (length 92mm x width 90mm). The square arenas could be differentiated by the presence  
268 of salient visual cues. Individual mice were randomly assigned to a particular Y-maze throughout  
269 habituation and testing. Mice were always released inside the middle arm (the arm closest to the  
270 nearest room wall), with their backs to the right and left arms, which contained objects (see  
271 Materials). This strategy, following the guidelines by Antunes and Biala (2012), ensured that external  
272 pressure to explore the objects was avoided. During the interval between exposures (habituation) and  
273 the inter-trial interval (ITI, experiments), mice from each cage group were placed in separate holding  
274 cages (standard housing cages, Techniplast), which remained the same throughout the project. Mice



275 from each cage group were run simultaneously in four Y-mazes placed next to each other. Video  
276 cameras (JVC, 40x optical zoom) placed above the Y-mazes recorded animal performance.

277

278

## 279 **Materials**

280 The objects used in experiments were either built from LEGO<sup>®</sup> pieces or various other plastic shapes  
281 (Figure 1). Given that the egg halves were identical in shape, the difference in their colour as well as  
282 their position in the maze (face-down or on one side with either convex or concave side facing the  
283 animal) were used to create different object types. All objects were odour-neutral and made of plastic  
284 in order to avoid material preference, minimise odour saturation and facilitate cleaning. The objects  
285 were attached to the floor inside the Y-maze with Blu-Tack<sup>®</sup>. Objects used in the habituation phase  
286 were plastic letters and were never used in subsequent experimental trials. New object types were  
287 used in each experiment, in order to avoid habituation to any object type.

288

289 For each experiment, soiled cage bedding from cages containing four female mice (C57BL/6J strain)  
290 was used to label some objects with female odour. The objects to be labelled with female odour were  
291 placed in the bedding the day prior to each trial, around midday (12:00pm). For the experiments that  
292 lasted four days (Experiments 1, 3 and 4), halfway through each experiment (at the end of day 2), the  
293 bedding with female odour was replaced with bedding from a cage containing a second group of  
294 control females of the same strain. For the experiments that lasted only 2 days (Experiments 2, 5 and  
295 6), the bedding remained the same throughout each experiment, but was changed before the start of  
296 the next experiment. The reason for this was that it was observed that the mice had a tendency to  
297 habituate to the smell after day 2 and using new bedding prevented this. Objects with female odour  
298 are here referred to as 'O+'. Copies of the same object but without odour are referred to as 'O-'.  
299 Objects that were never infused with odour are termed 'X-'. Y-mazes and objects were cleaned  
300 thoroughly with 70% ethanol and wiped with paper towels between trials with mice from different  
301 group cages, as well as at the end of each daily session.

302

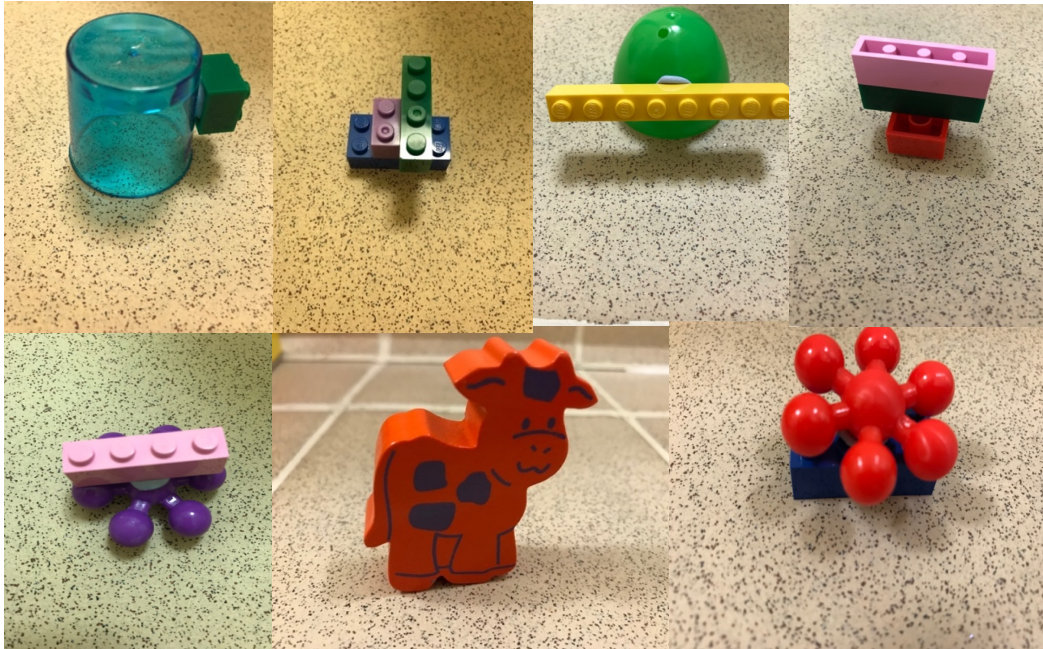

*Figure 1. Examples for objects used in the study*

303

304 **Procedure.** The tasks used in this study were a modified version of the classical NOR task (Berlyne,  
305 1950). The procedure of each experiment is depicted in Figure 2. The study began with a  
306 familiarisation stage, during which the animals were handled for one minute on two consecutive days  
307 so that they became accustomed to the experimenter.

308

309 **Habituation.** After familiarisation, the mice were habituated to the testing apparatus and objects over  
310 a five-day period prior to Experiment 1. The first day of habituation consisted of a 10-minute cage  
311 group habituation session to the Y-mazes, in which mice from a given cage were placed together in  
312 one Y-maze, in the absence of objects. On the following day, the mice were exposed individually to  
313 the Y-maze for 10 minutes, again without objects. On the third day, the same steps from day 2 were  
314 repeated, but this time an O was present in either the left or right choice arm. On the fourth day,  
315 following the same steps as on day 3, each animal was exposed to another O-, but in the opposite arm  
316 to the one on day 3. The last day of habituation consisted of two exposures, this time with an O+ in  
317 either the left or right arm of the maze. The duration of exposure was 10 minutes and the interval  
318 between exposures was 5 minutes. During the 5-minute interval, the mice were placed in their holding  
319 cages and the O+s presented in the first exposure were replaced with different O+s for the second  
320 exposure. In addition, mice were habituated to O<sup>a</sup> objects in either left or right arm.

321

322 **Experimental stage.** Following habituation, the mice were tested in six different experiments.  
323 Experiments 1, 3 and 4 were conducted on four consecutive days. Experiments 2, 5, 6 and 7b were  
324 conducted on two consecutive days. There were two experimental trials each day. The interval

325 between two experimental trials (ITI) was 5 minutes. During the ITI, the animals were placed in  
326 holding cages and the objects were replaced for the next trial. The particular object used in a given  
327 trial (O+, O-, X- or O<sup>a</sup>), the order in which objects were presented and their locations in the maze (left  
328 or right choice arm) were randomised for each animal in each experiment. This randomisation  
329 ensured that each animal was exposed to a given object only in one experimental trial across the entire  
330 study. Each animal experienced the same number of O+, O-, O<sup>a</sup> and X objects in each experiment.  
331 Apart from Experiment 1, each animal was exposed only to one O+ on each day and whether this was  
332 in the first or second trial of the day was counterbalanced. All of the experiments were performed  
333 consecutively by the same animals. Chronologically, the experiments were carried out in the  
334 following order: Experiment 1, Experiment 3, Experiment 4, Experiment 2, Experiment 5,  
335 Experiment 6, Experiments 7a and 7b. Thus, the mice were 14 weeks (3.5 months) old in Experiment  
336 1, 16 weeks (4 months) old in Experiment 3, 19 weeks (almost 5 months) old in Experiment 4 and 29-  
337 30 weeks (around 7.5 months) old in Experiments 2, 5, 6 and 7a and 7b.

338

339 **Experiment 1.** This experiment consisted of eight trials in total per animal. Trials included one  
340 exposure to a single object, either O+ or O-. The duration of each trial was one minute (see row 1 of  
341 Fig. 2).

342

343 **Experiment 2.** This experiment was composed of four trials per animal. Each trial included an initial  
344 exposure to O- for one minute (the ‘study phase’), either in the left or the right arm of the maze,  
345 followed by an exposure either to O- or O+ for 3 minutes (the ‘test phase’; see row 2 of Fig. 2).

346

347 **Experiment 3.** This experiment included eight trials in total per animal. Each trial included a study  
348 phase, where animals were exposed to O- for one minute, either in the left or the right arm of the  
349 maze. The location of O- in the study phase is referred to as the ‘familiar’ location. The other location  
350 – the arm that was empty during the study phase – is referred to as the ‘novel’ location. During the  
351 test phase animals were exposed to both O- and O+ for 3 minutes. The O+ was always placed in the  
352 ‘novel’ location (see row 3 of Fig. 2).

353

354 **Experiment 4.** This experiment was identical to experiment 2, except that in the test phase O+ was in  
355 a familiar location (see row 4 of Fig. 2).

356

357 **Experiment 5.** This experiment was composed of four trials in total per animal. Each trial included a  
358 study phase, where animals were exposed to O- for one minute, either in the left or the right arm of  
359 the maze. The location of O- in the study phase is referred to as the ‘familiar’ location. The other  
360 location – the arm that was empty during the study phase – is referred to as the ‘novel’ location.  
361 During the test phase animals were exposed to both O+ and X- (an entirely novel object) for 3

362 minutes. The O+ was always placed in the ‘novel’ location (see row 5 of Fig. 2).

363

364 **Experiment 6.** This experiment was identical to experiment 5, except that O+ in the test phase always  
365 occupied a familiar location (see row 6 of Fig. 2).

366

367 **Experiment 7a.** In order to ensure that the mice were to some extent attracted to almond odour, we  
368 tested the preference of mice for almond odour in a four-trial-per-animal experiment, where mice  
369 were simultaneously exposed to two filter papers, one without any odour and the other infused with  
370 almond smell, at randomly determined locations in the Y-maze (left or right arm). To label the  
371 almond-odour paper with almond smell, we used a cotton-tipped applicator dipped in pure almond oil  
372 (100% concentration, by Atlantic Aromatics, Bray, Co.Wicklow, Ireland) and then scrubbed it on a  
373 small piece of filter paper.

374

375 **Experiment 7b.** In this experiment, O+ in the test phase was always placed at a familiar location and  
376 the O<sup>a</sup> occupied a novel location (see row 7 of Fig. 2). The number of trials and the way the  
377 experiment was conducted was identical to Experiments 5 and 6. For labelling the objects with  
378 almond odour, we scrubbed O objects with cotton-tipped applicators dipped in pure almond oil (100%  
379 concentration, by Atlantic Aromatics, Bray, Co.Wicklow, Ireland), thus obtaining O<sup>a</sup>s; in addition, in  
380 order to remove the oiliness from these objects which could have led to a possible bias in attention  
381 capture (arising from a difference in texture between O+ and O-), the latter were also gently wiped  
382 with paper towel before being placed in the Y-mazes.

383

384

385

386

387

388

389

390

391

392

393

394

395

396

397

398

399  
 400  
 401  
 402  
 403  
 404  
 405  
 406  
 407  
 408  
 409  
 410  
 411  
 412  
 413  
 414  
 415  
 416  
 417  
 418  
 419  
 420  
 421  
 422  
 423  
 424  
 425  
 426  
 427  
 428  
 429  
 430  
 431  
 432  
 433  
 434  
 435

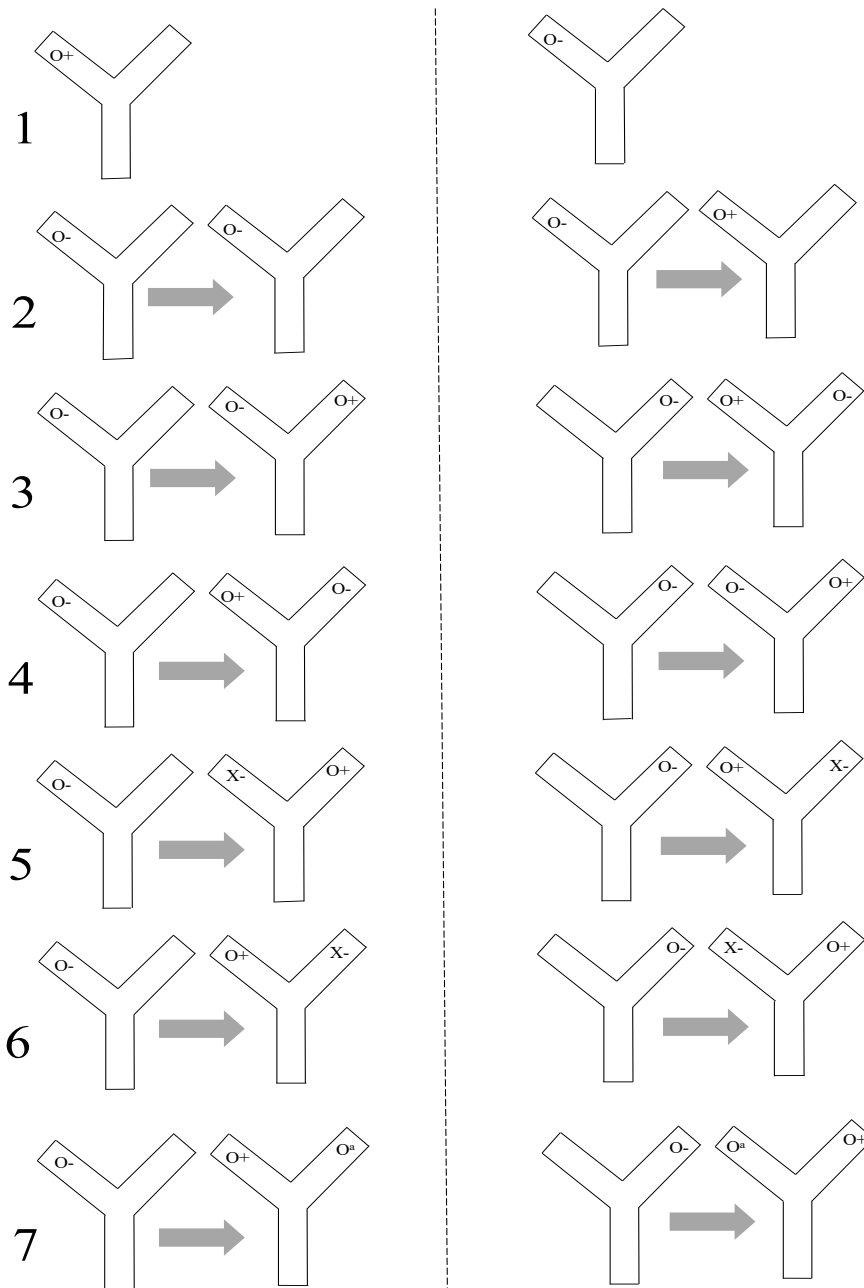

**Figure 2. Experimental design.**

*Trial types in experiments 1-7 are illustrated (one experiment in each row). O+: female-mouse-odour-infused object. O-: odour-neutral object. X-: novel object, never infused with odour. O<sup>a</sup>: almond-odour-infused object. Different copies of objects were used in two-phase experiments (Experiments 3-7).*

436 **Data analysis.** Exploratory behaviour was recorded with video cameras and subsequently, object  
437 exploration time for each object was scored using the Novel Object Timer software (Jack Rivers-  
438 Auty; Novel Object Recognition Task Timer, 2015). The animal was considered to be exploring an  
439 object when its nose was within 2cm of the object and directed at the object. Sitting next to the object  
440 or climbing on top of the object was not regarded as exploratory behaviour. Each trial was scored  
441 twice for accuracy and the average of the two scorings taken as the object exploration time per trial.  
442 The mean exploration time of O+, O-, O<sup>a</sup> and X- was obtained by averaging all trials with these  
443 objects for each animal.

444

445 The displacement index (D2), used to assess object preference from Experiments 3 onwards, was  
446 calculated using the formula:  $D2 = (T_{O+} - T_{O-}) / (T_{O+} + T_{O-})$ , where  $T_{O+}$  is the mean exploration time of  
447 O+ objects and  $T_{O-}$  is the mean exploration time of O objects. The values for this index are bound  
448 within a range of -1 and 1; positive D2 values indicated preference for O+, while negative values  
449 signified preference for O- and a value of 0 signified no preference (Burke, Wallace, Nematollahi,  
450 Uprety, & Barnes, 2010; Oliveira, Hawk, Abel, & Havekes, 2010).

451

452 The differences in total exploration time of O+, O-, O<sup>a</sup> and X- were analysed with paired t-tests (two-  
453 tailed). D2 values were analysed with one-sample t-tests. In Experiments 3-4, we also investigated the  
454 effect of experiment day, using a repeated-measures 2 (Object type: O+, O-) x 4 (day: 1-4) ANOVA.  
455 Statistical tests were performed in GraphPad Prism 8.

456

457

## Results

458

### 459 **Experiment 1: Novel objects O+ vs. O-**

460 The total time animals spent exploring O+ was significantly higher than the total exploration time for  
461 O- ( $t(5)=4.11$ ,  $p=0.0092$ ) as illustrated in Figure 3 (left panel). This finding demonstrates that when  
462 both O+ and O- are novel, the former attracts more attention. Two animals were excluded from the  
463 analysis of Experiment 1 due to a counterbalancing error.

464

### 465 **Experiment 2: Familiar objects O+ vs. O-**

466 The total object exploration time in Experiment 2 (Fig. 3 right panel) was significantly higher for O+  
467 than O- ( $t(7)=3.67$ ,  $p=0.008$ ). This finding demonstrates that when both O+ and O- are familiar, the  
468 former attracts more attention.

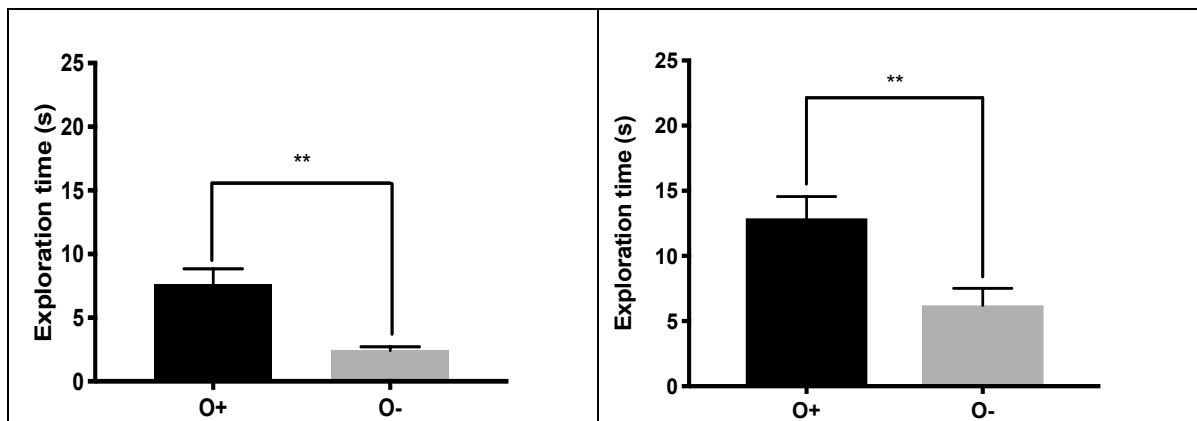

**Figure 3. Exploration of single objects in Experiments 1 and 2.**

**Left:** Results of Experiment 1: Novel O+ vs. Novel O-. **Right:** Results of Experiment 2: Familiar O+ vs. Familiar O-. Bar graphs represent object exploration times (in seconds) averaged across animals. Data are presented as means  $\pm$  SEM. Statistical significance is expressed with \*\* ( $p \leq 0.01$ ).

469

470 **Experiment 3: Competition between O+ in a novel location and O- in a familiar location.**

471 Figure 4 shows that the total exploration time for O+ was significantly higher than that for O-  
 472 ( $t(7)=6.99$ ,  $p=0.0002$ ). Additionally, animals demonstrated a significant preference for O+ over O-,  
 473 as indicated by D2 value, which was significantly higher than zero ( $t(7)=9.33$ ,  $p<0.0001$ ). Object  
 474 exploration time was analysed across experimental days for any effect of day or interaction between  
 475 object type and day. A repeated-measures two-way-ANOVA test found that there was a significant  
 476 effect of object type ( $F(1,7)=47.84$ ,  $p<0.001$ ). While numerically this difference diminished across  
 477 days, neither the effect of day ( $F(3,21)=2.93$ ,  $p=0.06$ ), nor the interaction ( $F(3,21)<1$ ,  $p=0.53$ ) were  
 478 significant.

479

480 **Experiment 4: Competition between O+ in a familiar location and O- in a novel location.**

481 The total exploration time of O+ was significantly higher than that of O- ( $t(7)=3.48$ ,  $p=0.01$ ; Figure  
 482 4). The D2 value (Figure 4), indicating the preference for O+ over O-, was significantly higher than  
 483 zero ( $t(7)=3.67$ ,  $p=0.008$ ). Object exploration time was analysed across experimental days for any day  
 484 effect or interaction between object type and day. Replicating the above results, there was a  
 485 significant effect of object type ( $F(1,7)=12.02$ ,  $p=0.01$ ), as determined by a two-way-ANOVA test. As  
 486 in the previous experiment, here the effect of day ( $F(3,21)=2.24$ ,  $p=0.11$ ) and the interaction  
 487 ( $F(3,21)=1.13$ ,  $p=0.36$ ) were not significant.

488

489 At the end of the third experiment, it was interesting to determine if the mice had higher preference  
 490 for O+ placed in a novel location than for O+ in a familiar location. The overall D2 values from  
 491 experiments 3 and 4 were statistically compared with a Student's paired t-test. As illustrated in Figure



492 4, the D2 value for O+ in a novel location was significantly greater than that for O+ in a familiar  
 493 location ( $t(7)=2.32$ ,  $p=0.027$ ), indicating that location novelty increased the motivational value of O+.  
 494 However, since the D2 values were from two separate experiments, it is important to take into account  
 495 possible confounds arising from a counter effect of habituation. Since Experiment 4 followed  
 496 Experiment 3, animals might have been less motivated to explore the objects in the former than in the  
 497 latter.

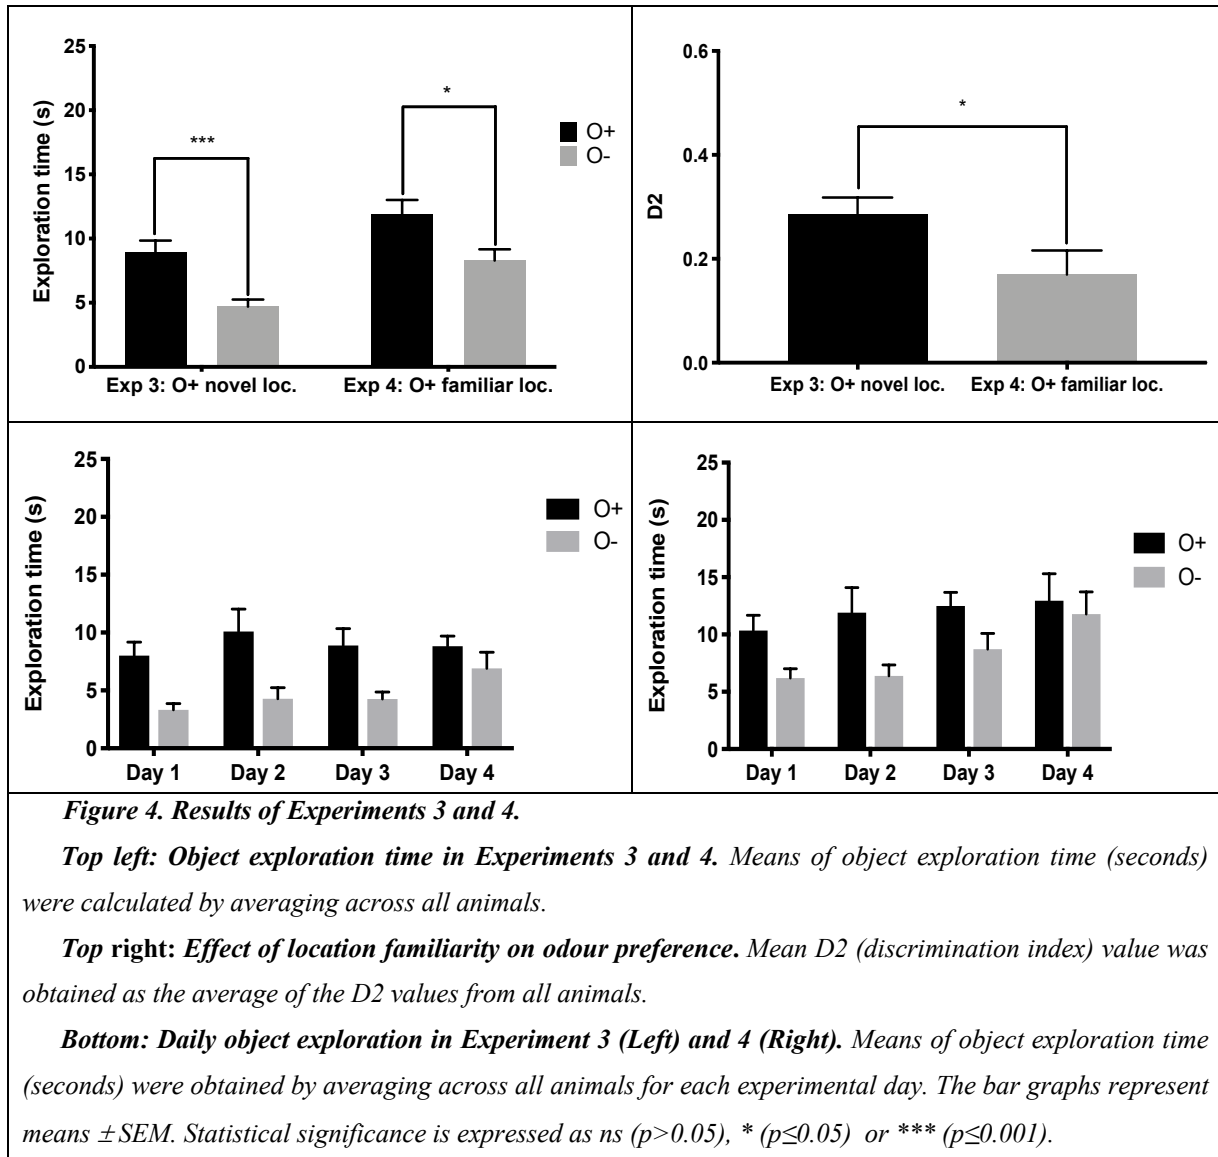

498

499 **Experiment 5: Competition between O+ in a novel location and X- in a familiar location.**

500 As shown in Figure 5, the total object exploration time in Experiment 5 was significantly higher for  
 501 O+ than for X ( $t(7)=5.63$ ,  $p=0.0008$ ). A one sample t-test showed that the D2 value was significantly  
 502 higher than zero, indicating a preference for O+ over X ( $t(7)=4.92$ ,  $p=0.0017$ ).

503

504 **Experiment 6: Competition between O+ in a familiar location and X- in a novel location.**

505 The total object exploration time in Experiment 6 was higher for O+ than for X-, however, the

506 difference was not statistically significant ( $t(7)=1.8$ ,  $p=0.1158$ , Figure 5). The D2 value in this  
 507 experiment was also not significantly higher than zero, suggesting no significant preference for O+  
 508 over X- ( $t(7)=2.023$ ,  $p=0.0828$ ).

509

510 Additionally, the results from Experiment 5 and Experiment 6 were compared in order to determine  
 511 the effect of location familiarity and object type (novel identity or odour-infused) on exploration time  
 512 and object preference. The same caveats hold for this comparison across experiments as for the one  
 513 across Experiments 3 and 4. A repeated-measures two-way-ANOVA test found that there was a  
 514 significant effect of location ( $F(1,7)=19.23$ ,  $p=0.003$ ) with a preference for the novel object, as well as  
 515 of object type ( $F(1,7)=11.68$ ,  $p=0.011$ ), but no significant interaction ( $F(1,7)=1.59$ ,  $p=0.246$ ). It is  
 516 difficult to interpret these results conclusively as indicative of additive or sub-additive effects, given  
 517 the lack of counterbalance between experiments and potential effects of habituation.

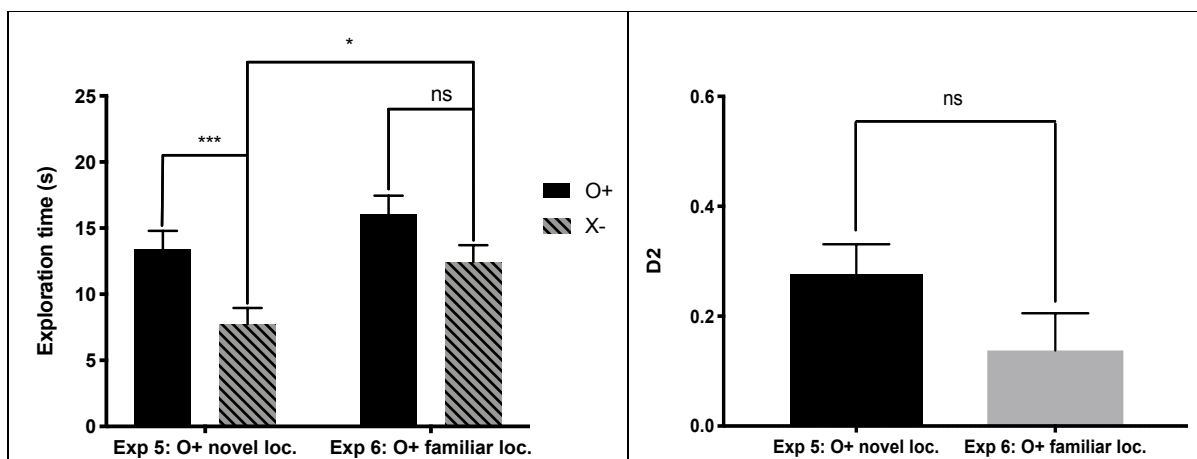

**Figure 5. Results of Experiments 5 and 6.**

**Left: Effect of object identity and location familiarity on exploration time.** Means of object exploration time (seconds) were calculated by averaging across all animals. Bar graphs represent object exploration times (in seconds) averaged across animals.

**Right: Effect of object identity and location familiarity on object preference.** Mean D2 (discrimination index) value was obtained as the average of the D2 values from all animals. Data are presented as means  $\pm$  SEM. Statistical significance is expressed as ns ( $p>0.05$ ), \* ( $p\leq 0.05$ ) or \*\*\* ( $p\leq 0.001$ ).

518

519 In Experiments 5 and 6, it was also interesting to observe the choice the animal made when it had to  
 520 decide which object to explore first (O+ or X-); this is referred to as *first object choice*. A binomial  
 521 test revealed that there was not enough evidence to reject the null hypothesis, according to which  
 522 animals were equally likely to explore either object ( $p=0.1402$  in Experiment 5,  $p=0.2153$  in  
 523 Experiment 6).

524

525 Experiment 7a was necessary to investigate if mice are able to detect the smell of almond and,  
 526 moreover, if they find this smell attractive. Figure 6 shows that the total exploration time of filter

527 papers with almond odour was significantly greater than the exploration time of an odour-free filter  
 528 paper ( $t(7)=2.9$ ,  $p=0.0229$ ). The D2 value, which was found to be significantly higher than zero  
 529 ( $t(7)=3.5$ ,  $p=0.0101$ ), confirms the preference of mice for almond odour compared to no odour.

530

531 **Experiment 7b: Competition between O+ in a familiar location and O<sup>a</sup> in a novel location.**

532 The overall exploration time for O+ was significantly higher than that for O<sup>a</sup> ( $t(7)=7.5$ ,  $p=0.0001$ ) and  
 533 the D2 value was significantly larger than zero ( $t(7)=11.5$ ,  $p<0.0001$ , Figure ), indicating preference  
 534 for O+ over O<sup>a</sup>.

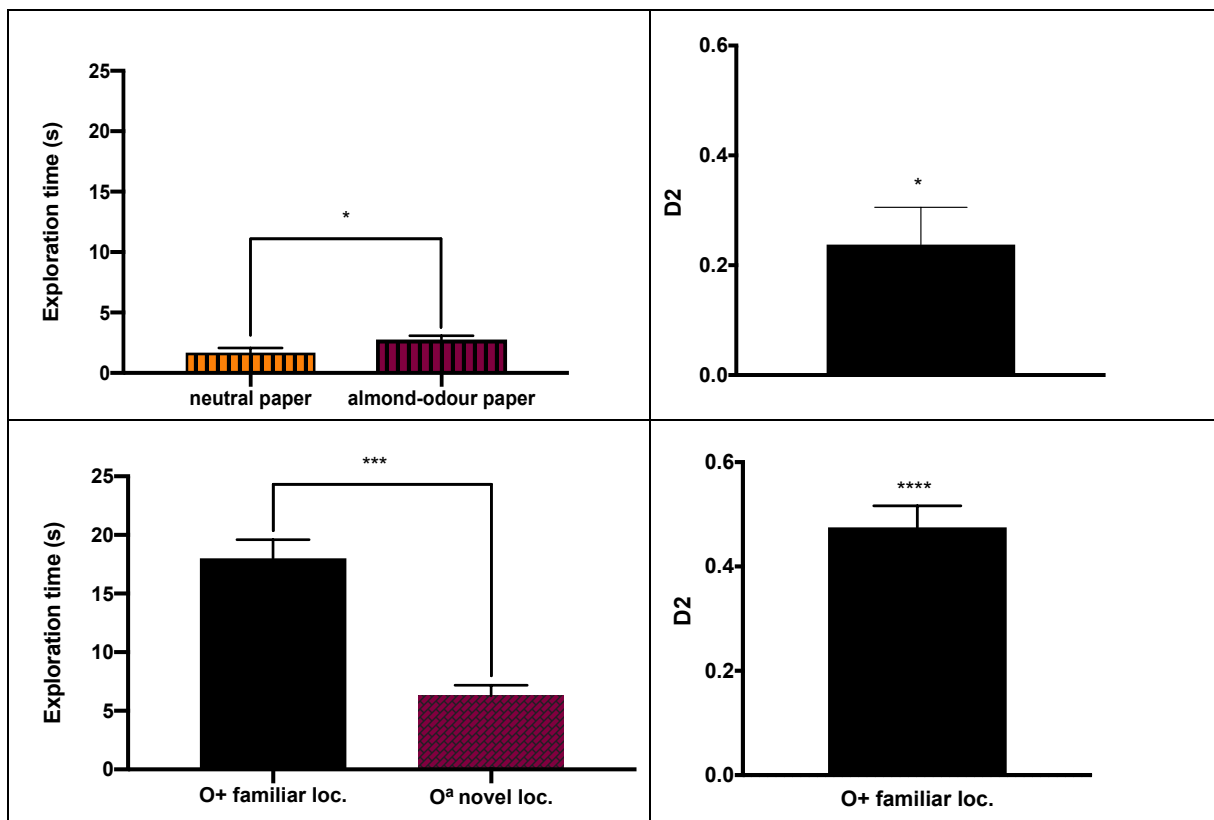

**Figure 6. Results of Experiment 7.**

**Top left: Effect of odour on exploration time in Experiment 7a.** Means of object exploration time (seconds) were calculated by averaging across all animals. Bar graphs represent exploration times (in seconds) averaged across animals.

**Top right: Odour preference in Experiment 7a.** Mean D2 (discrimination index) value was obtained as the average of the D2 values from all animals. Data are presented as means  $\pm$  SEM. Statistical significance is expressed as \* ( $p<0.05$ ).

**Bottom left: Effect of odour on exploration time in Experiment 7b.** Means of object exploration time (seconds) were calculated by averaging across all animals. Bar graphs represent object exploration times (in seconds) averaged across animals.

**Bottom right: Effect of odour on object preference in Experiment 7b.** Mean D2 (discrimination index) value was obtained as the average of the D2 values from all animals. Data are presented as means  $\pm$  SEM. Statistical significance is expressed as \*\*\* ( $p\leq0.001$ ) or \*\*\*\* ( $p\leq0.0001$ ).

## Discussion

535

536

537 Evidence for VMAC from sensory domains outside vision is sparse, despite abundant research on  
538 different sensory modalities involved in bottom-up and top-down attention processes (Spence, 2010).  
539 The reason for this is that the initial identification of VMAC was for visual cues and since then, the  
540 scientific focus has been on analysing how learnt value affects visual attention (Chelazzi et al., 2014;  
541 Failing & Theeuwes, 2014; Qi, Zeng, Ding, & Li, 2013). Extending the principles of VMAC to other  
542 sensory domains is essential for a more complex understanding of this attentional process and can  
543 help integrate current knowledge of the modulatory effects of learnt reward on sensory processing  
544 (Pantoja et al., 2007). In the study we report here, we investigated the attentional capture by an  
545 olfactory stimulus and the possibility of any cross-modal interference with visual stimulation by an  
546 object at a novel location or a novel object in the arena.

547

548 Previous studies have shown that female odour represents a positive arousing stimulus for laboratory  
549 male mice (Beny & Kimchi, 2014; Connor, 1972; Mackintosh, 1970). According to Beny and Kimchi  
550 (2014), sexually inexperienced (naïve) male mice display sexual behaviours towards female  
551 conspecifics and manifest aggression towards other male mice. Connor (1972) demonstrated that  
552 pheromones found in urine are responsible for these dimorphic behaviours. In his experiments, male  
553 mice displayed milder aggressive behaviours towards male intruders smelling of female urine and  
554 behaved aggressively towards females swabbed with male urine. These behaviours are genetically  
555 determined and, therefore, do not require prior learning. The only experience these laboratory mice  
556 had with female odours was during weaning, in the presence of their mothers, after which they were  
557 isolated from female conspecifics.

558

559 In line with these observations, the results from our Experiments 1 and 2 support the conclusion that  
560 male mice pay significantly more attention to O+ than O-. In general, in these experiments, there  
561 seems to be longer exploration of familiar objects compared to novel ones, which might be explained  
562 be a slight neophobia in the mice. Taken together, these experiments confirmed our hypothesis that  
563 female odour captures more attention than an odourless object. These experiments ensured that our  
564 mice displayed behaviours as expected, based on the aforementioned literature, so we were able to  
565 proceed to the next stages of the study.

566

567 The following aims were to elucidate how much attention odour would capture when the location of  
568 O+ was either novel or familiar. Previous studies have already established that under normal  
569 conditions, adult rats show preference for an object at a novel location compared to an identical object  
570 at a previously experienced location (Aggleton, Albasser, Aggleton, Poirier, & Pearce, 2010; Barker  
571 & Warburton, 2011; Ennaceur et al., 1997). Therefore, it was not surprising that in Experiment 3, O+

572 at a novel location attracted more attention than an O- at a familiar location, since both its odour and  
573 location provided O+ with more motivational significance than O-. Interestingly, in Experiment 4,  
574 where O+ at a familiar location competed with O- at a novel location, O+ still attracted more  
575 attention. This represents a notable finding, as it shows that female odour ‘wins’ over a previously  
576 known arousing factor (location novelty) in the amount of attention captured. In a human study of  
577 auditory attention, Anderson (2016) demonstrated that VMAC by sounds previously associated with a  
578 reward interfere with a visual task and compete with the visual representation of stimuli, reflecting  
579 cross-modal stimulus competition bias by VMAC. Our study shows that, at least in mice performing a  
580 NOR task, a positively stimulating odour outcompetes a visual stimulus (location novelty) for  
581 attention, thus extending the findings from humans to animals and also to a different sensory domain.

582

583 At first glance, the observation that O+ at a novel location attracts more attention than O+ at a  
584 familiar location might seem intuitive: in the first case, O+ consists of two motivational stimuli –  
585 odour and location novelty, while in the second case O+ only has the odour. However, this also  
586 emphasises an aspect worth taking into consideration – the fact that multiple stimuli can act in  
587 combination to influence attention. Studies focusing on episodic memory have demonstrated that rats  
588 and mice form integrated representations of three distinct object features: its identity, location and the  
589 context in which it was experienced. Being able to associate these separate components allows the  
590 animal to achieve a complex representation and record of environmental experiences, and this has  
591 been termed ‘episodic-like memory’ in rodent models (Davis, Eacott, Easton, & Gigg, 2013; Eacott,  
592 2004). In light of this work, the interpretation of how O+ at familiar location versus O+ at novel  
593 location affects attention allocation could be further extended. The combination of odour and location  
594 provides the animal with more detailed information about the object and, thus, it attracts more  
595 attention than either odour or location alone. This suggests that odour can act not only on its own, but  
596 also as a component of a stimulating context to modify the degree of attention allocation, thus  
597 influencing other cognitive processes (e.g., episodic memory) in an additive manner.

598

599 Statistically, there was no day effect on the exploration time of O+ and O- in Experiments 3 and 4.  
600 However, the daily means of exploration time indicate that there was a tendency for the attention  
601 capture by O+ to decline across trials. This might be due to the male mice learning over the first three  
602 trials that if they encounter female olfactory cues, this does not predict the availability of the female  
603 mice, so the female odour starts to lose attentional allocation. This observation should be considered  
604 in future behavioural studies using odours, particularly if such studies involve several trials. In our  
605 study, using odour from different females after four consecutive trials was an attempt to avoid  
606 habituation to odour.

607

608 Once we were able to determine that odour elicits more attentional capture than location novelty, the  
609 next logical step was to study attention allocation to odour when competing with another powerfully  
610 arousing stimulus – novel identity. The motivational value of novel identity has been the premise of  
611 many studies using the NOR task, in which rodents are expected to pay more attention to the novel  
612 rather than the familiar object. In our study, odour captured more attention than a novel object when  
613 the location of the former was novel, while the location of the latter was familiar (Experiment 5). If  
614 we assume that location is a visual stimulus, then odour in association with a visually arousing  
615 stimulus captures more attention than another visual stimulus known to be salient to rodents.  
616 However, in Experiment 6, when X- was placed at a novel location and O+ at a familiar location,  
617 odour could no longer ‘win’ over novel identity plus location in the degree of attention allocation.  
618 These findings suggest that, on their own, odour and object identity might have the same motivational  
619 significance to mice and their combination with other arousing stimuli can shift the balance in favour  
620 of one over the other.

621

622 Nevertheless, it is not yet clear how visual and olfactory stimuli interact to capture the attention of  
623 mice and whether the two kinds of stimuli are indeed equally motivational. A rather surprising  
624 observation in Experiment 5 was that, in a single case, a particular X- type attracted more attention  
625 than its O+ counterpart; this indicates that in some circumstances, visual cues elicit stronger effects on  
626 attention than olfactory cues. Le Pelley et al. (2016) argue that competition between a physically  
627 salient and a less salient cue can alter attention, which can in turn affect the degree of learning. Since  
628 both visual and olfactory cues convey important adaptive information to rodents, the question we  
629 might ask is what determines whether a certain visual or olfactory cue attracts more attention than  
630 other motivational stimuli present in the same environment. This question should motivate further  
631 research into object type preference in mice, as well as more comparisons between the effects of  
632 visual and olfactory cues on attention allocation.

633

634 A recent study in monkeys showed that for the visual system, novelty enhanced the motivational  
635 value of stimuli associated with a negative outcome, while for the reward system, the effects of  
636 novelty dissipated for such stimuli (Foley, Jangraw, Peck, & Gottlieb, 2014). This led the researchers  
637 to conclude that novelty acts on attentional mechanisms independent of reward to influence the  
638 processing of information and learning. In light of this finding, our experiments in mice could be  
639 interpreted not just in terms of competition between novelty and a reward-associated stimulus, but  
640 rather as evidence that reward and novelty are dissociable. In the future, it would be interesting to  
641 investigate in humans whether this distinction can be made at both psychological and neurobiological  
642 levels, especially since, contrary to this theory, prior research on animals has suggested that the  
643 effects of novelty can be explained in terms of reward (Horvitz, 2000; Kakade & Dayan, 2002;  
644 Laurent, 2008).

645 Several studies have demonstrated that the value of a particular stimulus feature (e.g., colour) in  
646 predicting reward results in more attention being allocated to the same or similar features (Kalish &  
647 Kruschke, 2000; Lawrence, Sahakian, Rogers, Hodges, & Robbins, 1999; Sutherland & Mackintosh,  
648 1971). In our study, male mice were likely to evaluate female odour as an endogenously highly  
649 motivational stimulus. We are still uncertain as to whether naïve males consider female odour to be  
650 reminiscent of their mothers and, thus, have a predictive value acquired through learning. In the  
651 future, it would be useful to compare the degree of attention allocation to female odours with that to  
652 odours or other stimuli that are predictive of an outcome (preferably a rewarding outcome, since  
653 female odour is considered a positively arousing stimulus due to its effects on reproductive  
654 behaviours).

655

656 In our study, mice clearly showed more interest in a filter paper infused with almond smell than in an  
657 odour-free filter paper. As expected, there was an observable trend of the overall exploration time to  
658 decrease over the course of the four trials, which is in line with the findings of Rattazzi, Cariboni,  
659 Poojara, Shoenfeld, & D'Acquisto (2015), who reported that mice habituated to the odours after the  
660 first exposure, since the odour exploration time was significantly reduced in the second and third  
661 exposures compared with the first exposure.

662

663 Rattazzi, Cariboni, Poojara, Shoenfeld, & D'Acquisto (2015) used a 100-fold dilution of almond  
664 extract (10µl almond extract to 990µl distilled water) and the solution was prepared in the morning of  
665 the same day of the test. In the present study, almond-odour infused filter papers and O<sup>a</sup> objects were  
666 also prepared on the day of each trial, but we did not use any dilutions (O<sup>a</sup> objects had been labelled  
667 with 100%-concentrated almond oil). Given that the potency of almond oil in our experiment was  
668 likely higher than that used by above-mentioned authors, almond odour could have 'trumped' female  
669 odour in animals' attention capture. This was, however, not the case – mice consistently showed  
670 significantly higher exploration time and preference for O<sup>+</sup> in Experiment 7. This observation was  
671 very interesting, as it not only confirmed that mice are more attracted to female odour than to a non-  
672 social odour (which was already well-established in the literature), but it showed that this holds true,  
673 even when almond odour is intense and found at a novel location. Experiment 7 represents a very  
674 important addition to our study, because with it we were able to compare the degree of attention  
675 allocation to female odour with that to another olfactory stimulus with lesser motivational  
676 significance.

677

678 One explanation that could have accounted for the very high preference of mice for O<sup>+</sup> compared  
679 with O<sup>a</sup> was that, in fact, the high concentration of almond oil resulted in the odour of O<sup>a</sup> being  
680 aversive to the mice. According to (Saraiva et al., 2016), some odours that are attractive at a low  
681 concentration can become aversive in high concentrations. In our Experiment 7, however, we were



682 able to determine whether the mice were attracted or repulsed by the almond smell by looking at the  
683 video recordings. Mice did not display avoidance behaviour toward O<sup>a</sup> objects; they not only sniffed  
684 the O<sup>a</sup>s multiple times upon their first discovery of such object in one of the Y-maze's arms, but they  
685 also returned to this object several times during the 3-minute test. Considering that the Y-maze  
686 contains three arms and that in Experiment 7, one arm was always object-free, and another arm  
687 contained a highly attractive odour (O<sup>+</sup>), the animal could have easily avoided O<sup>a</sup> by never returning  
688 to the respective arm. Clearly, mice did not find O<sup>a</sup>s aversive, but they showed a distinct preference  
689 for O<sup>+</sup>s.

690

691 In summary, the present study used object exploration measures to quantify the degree of attention  
692 allocation by male mice to object novelty and/or female odour. Initial experiments demonstrated that  
693 in the absence of other arousing features, objects with female odours capture more attention than an  
694 odour-neutral object. These results agree with previous research showing that under laboratory  
695 conditions, sexually isolated male mice are aroused by the odour of female conspecifics. The study  
696 further demonstrated that odour 'wins' over location novelty in the degree of attention allocation and  
697 that its motivational value is even greater in combination with location novelty. This supports the  
698 conclusion that odour interacts with other arousing stimuli to form arousing contexts. Female odour  
699 was able to capture more attention than a novel object, but only when combined with location novelty,  
700 suggesting that the additive effects of visual and olfactory cues on attention exceed those of a single  
701 strongly arousing stimulus. Finally, female odour attracted more attention than a mildly attractive  
702 odour (low in motivational significance), suggesting that mice are able to form emotionally-charged  
703 memories that are different from memories associated with other stimuli. These experiments  
704 contribute to the understanding of the effects of female odour on value-modulated attention capture  
705 and provide a reliable protocol to quantify attention allocation in mice. The findings obtained here  
706 should encourage future research to use odour in investigating the influence of emotional arousal on  
707 attention and memory.

708

709

710 **Acknowledgements**

711 We thank G. Winocur for an inspiring discussion, J. Neill for her support, and C.  
712 Charalambous for statistical advice.

## References

- 713  
714
- 715 Aggleton, J.P., Albasser, M.M., Aggleton, D.J., Poirier, G.L., & Pearce, J.M. (2010). Lesions of the  
716 rat perirhinal cortex spare the acquisition of a complex configural visual discrimination yet  
717 impair object recognition. *Behavioral Neuroscience*, *124*, 55-68. doi:10.1037/a0018320
- 718 Alkam, T., Hiramatsu, M., Mamiya, T., Aoyama, Y., Nitta, A., Yamada, K., Kim, H.C., &  
719 Nabeshima, T. (2011). Evaluation of object-based attention in mice. *Behavioural Brain*  
720 *Research*, *220*, 185-193. doi:10.1016/j.bbr.2011.01.039
- 721 Anderson, B.A. (2016). Value-driven attentional capture in the auditory domain. *Attention Perception*  
722 *& Psychophysics*, *78*, 242-250. doi:10.3758/s13414-015-1001-7
- 723 Anderson, B.A., Laurent, P.A., & Yantis, S. (2011). Value-driven attentional capture. *Proceedings of*  
724 *the National Academy of Sciences of the United States of America*, *108*, 10367-10371.  
725 doi:10.1073/pnas.1104047108
- 726 Anderson, B.A., Laurent, P.A., & Yantis, S. (2014). Value-driven attentional priority signals in  
727 human basal ganglia and visual cortex. *Brain Research*, *1587*, 88-96.  
728 doi:10.1016/j.brainres.2014.08.062
- 729 Antunes, M., & Biala, G. (2012) The novel object recognition memory: Neurobiology, test procedure,  
730 and its modifications. *Cognitive Processing*, *13*, 93–110. doi:10.1007/s10339-011-0430-z
- 731 Arbuckle, E. P., Smith, G. D., Gomez, M. C., & Lugo, J. N. (2015). Testing for Odor Discrimination  
732 and Habituation in Mice. *Jove-Journal of Visualized Experiments*(99), 7. doi:10.3791/52615
- 733 Aston-Jones, G., Rajkowski, J., Kubiak, P., Valentino, R.J., & Shipley, M.T. (1996). Role of the locus  
734 coeruleus in emotional activation. *Emotional Motor System*, *107*, 379-402. Retrieved from  
735 [https://doi.org/10.1016/S0079-6123\(08\)61877-4](https://doi.org/10.1016/S0079-6123(08)61877-4)
- 736 Barker, G.R.I., & Warburton, E.C. (2011). When is the hippocampus involved in recognition  
737 memory?. *Journal of Neuroscience*, *31*, 10721-10731. doi:10.1523/JNEUROSCI.6413-10.2011
- 738 Beny, Y., & Kimchi, T. (2014). Innate and learned aspects of pheromone-mediated social behaviours.  
739 *Animal Behaviour*, *97*, 301-311. doi:10.1016/j.anbehav.2014.09.014
- 740 Berlyne, D.E. (1950). Novelty and curiosity as determinants of exploratory behaviour. *British*  
741 *Journal of Psychology*, *41*, 68–80. doi:10.1111/j.2044-8295.1950.tb00262.x
- 742 Brennan, P.A., & Kendrick, K.M. (2006). Mammalian social odours: Attraction and individual  
743 recognition. *Philosophical Transactions of the Royal Society B-Biological Sciences*, *361*, 2061-  
744 2078. doi:10.1098/rstb.2006.1931
- 745 Burke, S.N., Wallace, J.L., Nematollahi, S., Uprety, A.R., & Barnes, C.A. (2010). Pattern Separation  
746 Deficits May Contribute to Age-Associated Recognition Impairments. *Behavioral*  
747 *Neuroscience*, *124*, 559-573. doi:10.1037/a0020893

748 Chelazzi, L., Estocinova, J., Calletti, R., Lo Gerfo, E., Sani, I., Della Libera, C., & Santandrea, E.  
749 (2014). Altering spatial priority maps via reward-based learning. *Journal of Neuroscience*, *34*,  
750 8594-8604. doi:10.1523/JNEUROSCI.0277-14.2014

751 Chun, M.M., Golomb, J.D., & Turk-Browne, N.B. (2011). A taxonomy of external and internal  
752 attention. *Annual Review of Psychology*, *62*, 73-101. doi:  
753 10.1146/annurev.psych.093008.100427

754 Compton, R.J., 2003. The interface between emotion and attention: A review of evidence from  
755 psychology and neuroscience. *Behavioral and Cognitive Neuroscience Reviews*, *2*, 115–129.  
756 doi:10.1177/1534582303255278

757 Connor, J. (1972). Olfactory control of aggressive and sexual behavior in mouse (*Mus-musculus-L.*).  
758 *Psychonomic Science*, *27*, 1-3. doi:10.3758/BF03328867

759 Corbetta, M., Patel, G., & Shulman, G.L. (2008). The reorienting system of the human brain: From  
760 environment to theory of mind. *Neuron*, *58*, 306-324. doi:10.1016/j.neuron.2008.04.017

761 Corbetta, M., & Shulman, G.L. (2002). Control of goal-directed and stimulus-driven attention in the  
762 brain. *Nature Reviews Neuroscience*, *3*, 201-215. doi:10.1038/nrn755

763 Davis, K.E., Eacott, M.J., Easton, A., & Gigg, J. (2013). Episodic-like memory is sensitive to both  
764 Alzheimer's-like pathological accumulation and normal ageing processes in mice. *Behavioural*  
765 *Brain Research*, *254*, 73-82. doi:10.1016/j.bbr.2013.03.009

766 Desimone, R., & Duncan, J. (1995). Neural mechanisms of selective visual-attention. *Annual Review*  
767 *of Neuroscience*, *18*, 193-222. doi:10.1146/annurev.ne.18.030195.001205

768 Devore, S., Lee, J., & Linster, C. (2013). Odor Preferences Shape Discrimination Learning in Rats.  
769 *Behavioral Neuroscience*, *127*, 498-504. doi:10.1037/a0033329

770 Duffaud, A.M., Killcross, S., & George, D.N. (2007). Optional-shift behaviour in rats: A novel  
771 procedure for assessing attentional processes in discrimination learning. *Quarterly Journal of*  
772 *Experimental Psychology*, *60*, 534-542. doi:10.1080/17470210601154487

773 Eacott, M.J., & Norman, G. (2004). Integrated memory for object, place, and context in rats: A  
774 possible model of episodic-like memory?. *Journal of Neuroscience*, *24*, 1948-1953.  
775 doi:10.1523/jneurosci.2975-03.2004

776 Ennaceur, A. (2010). One-trial object recognition in rats and mice: Methodological and theoretical  
777 issues. *Behavioural Brain Research*, *215*, 244-254. doi:10.1016/j.bbr.2009.12.036

778 Ennaceur, A., Neave, N., & Aggleton, J.P. (1997). Spontaneous object recognition and object location  
779 memory in rats: The effects of lesions in the cingulate cortices, the medial prefrontal cortex, the  
780 cingulum bundle and the fornix. *Experimental Brain Research*, *113*, 509-519.  
781 doi:10.1007/pl00005603

782 Esber, G.R., & Haselgrove, M. (2011). Reconciling the influence of predictiveness and uncertainty on  
783 stimulus salience: A model of attention in associative learning. *Proceedings of the Royal*  
784 *Society B-Biological Sciences*, *278*, 2553-2561. doi:10.1098/rspb.2011.0836

785 Failing, M.F., & Theeuwes, J. (2014). Exogenous visual orienting by reward. *Journal of Vision*, *14*, 1-  
786 9. doi:10.1167/14.5.6

787 Foley, N.C., Jangraw, D.C., Peck, C., & Gottlieb, J. (2014). Novelty enhances visual salience  
788 independently of reward in the parietal lobe. *Journal of Neuroscience*, *34*, 7947-7957.  
789 doi:10.1523/jneurosci.4171-13.2014

790 Gaskin, S., Tardif, M., Cole, E., Piterkin, P., Kayello, L., & Mumby, D.G. (2010). Object  
791 familiarization and novel-object preference in rats. *Behavioural Processes*, *83*, 61-71.  
792 doi:10.1016/j.beproc.2009.10.003

793 George, D.N., & Pearce, J.M. (1999). Acquired distinctiveness is controlled by stimulus relevance not  
794 correlation with reward. *Journal of Experimental Psychology-Animal Behavior Processes*, *25*,  
795 363-373. doi:10.1037/0097-7403.25.3.363

796 Gitelman, D.R. (2003). Attention and its disorders. *British Medical Bulletin*, *65*, 21-34.  
797 doi:10.1093/bmb/65.1.21

798 Golomb, J.D., Nguyen-Phuc, A.Y., Mazer, J.A., McCarthy, G., & Chun, M.M. (2010). Attentional  
799 facilitation throughout human visual cortex lingers in retinotopic coordinates after eye  
800 movements. *Journal of Neuroscience*, *30*, 10493-10506. doi:10.1523/jneurosci.1546-10.2010

801 Hartikainen, M.K., Ogawa, H.K., Soltani, T.M., & Knight, T.R. (2007). Emotionally arousing stimuli  
802 compete for attention with left hemispace. *NeuroReport*, *18*, 1929-1933.  
803 doi:10.1097/WNR.0b013e3282f1ca18

804 Horvitz, J.C. (2000). Mesolimbocortical and nigrostriatal dopamine responses to salient non-reward  
805 events. *Neuroscience*, *96*, 651-656. doi:10.1016/S0306-4522(00)00019-1

806 Huckins, L. M., Logan, D. W., & Sanchez-Andrade, G. (2013). Olfaction and olfactory-mediated  
807 behaviour in psychiatric disease models. *Cell and Tissue Research*, *354*, 69-80.  
808 doi:10.1007/s00441-013-1617-7

809 Johnston, R.E. (2003). Chemical communication in rodents: From pheromones to individual  
810 recognition. *Journal of Mammalogy*, *84*, 1141-1162. doi:10.1644/BLe-010

811 Kadohisa, M. (2013). Effects of odor on emotion, with implications. *Frontiers in Systems*  
812 *Neuroscience*, *7*, 66. doi:10.3389/fnsys.2013.00066

813 Kakade, S., & Dayan, P. (2002). Dopamine: generalization and bonuses. *Neural Networks*, *15*, 549 –  
814 559. doi:10.1016/S0893-6080(02)00048-5

815 Kalish, M. L., & Kruschke, J. K. (2000). The role of attention shifts in the categorization of  
816 continuous dimensioned stimuli. *Psychological Research-Psychologische Forschung*, *64*, 105–  
817 116. doi:10.1007/s004260000028

818 Katsuki, F., & Constantinidis, C. (2014). Bottom-up and top-down attention: Different processes and  
819 overlapping neural systems. *Neuroscientist*, *20*, 509-521. doi:10.1177/1073858413514136

- 820 Kaye, H., & Pearce, J.M. (1984). The strength of the orienting response during Pavlovian  
821 conditioning. *Journal of Experimental Psychology-Animal Behavior Processes*, *10*, 90-109.  
822 doi:10.1037/0097-7403.10.1.90
- 823 Laurent, P.A. (2008). The emergence of saliency and novelty responses from reinforcement learning  
824 principles. *Neural Networks*, *21*, 1493–1499. doi:10.1016/j.neunet.2008.09.004
- 825 Lawrence, A. D., Sahakian, B. J., Rogers, R. D., Hodges, J. R., & Robbins, T. W. (1999).  
826 Discrimination, reversal, and shift learning in Huntington’s disease: Mechanisms of impaired  
827 response selection. *Neuropsychologia*, *37*, 1359 –1374. doi:10.1016/S0028-3932(99) 00035-4
- 828 Le Pelley, M.E., Mitchell, C.J., Beesley, T., George, D.N., & Wills, A.J. (2016). Attention and  
829 associative learning in humans: An integrative review. *Psychological Bulletin*, *142*, 1111-1140.  
830 doi:10.1037/bul0000064
- 831 Lee, T.-H., Sakaki, M., Cheng, R., Velasco, R., & Mather, M. (2014). Emotional arousal amplifies the  
832 effects of biased competition in the brain. *Social Cognitive and Affective Neuroscience*, *9*,  
833 2067-2077. doi:10.1093/scan/nsu015
- 834 Levine, L.J., & Edelman, R.S. (2009). Emotion and memory narrowing: A review and goal-relevance  
835 approach. *Cognition & Emotion*, *23*, 833-875. doi:10.1080/02699930902738863
- 836 Mackintosh, J.H. (1970). Territory formation by laboratory mice. *Animal Behaviour*, *18*, 177-183.  
837 doi:10.1016/0003-3472(70)90088-6
- 838 Mackintosh, N. J. (1975). A theory of attention: Variations in the associability of stimuli with  
839 reinforcement. *Psychological Review*, *82*, 276– 298. doi:10.1037/h0076778
- 840 McGaughy, J., & Sarter, M. (1998). Sustained attention performance in rats with intracortical  
841 infusions of 192 IgG-saporin-induced cortical cholinergic deafferentation: Effects of  
842 physostigmine and FG 7142. *Behavioral Neuroscience*, *112*, 1519-1525. doi:10.1037/0735-  
843 7044.112.6.1519
- 844 Michael, G.A., Jacquot, L., Millot, J.L., & Brand, G. (2003). Ambient odors modulate visual  
845 attentional capture. *Neuroscience Letters*, *352*, 221-225. doi:10.1016/s0304-3940(03)01078-4
- 846 Miller, E.K., & Cohen, J.D. (2001). An integrative theory of prefrontal cortex function. *Annual*  
847 *Review of Neuroscience*, *24*, 167-202. doi:10.1146/annurev.neuro.24.1.167
- 848 Mumby, D.G., Glenn, M.J., Nesbitt, C., & Kyriazis, D.A. (2002). Dissociation in retrograde memory  
849 for object discriminations and object recognition in rats with perirhinal cortex damage.  
850 *Behavioural Brain Research*, *132*, 215-226. doi:10.1016/s0166-4328(01)00444-2
- 851 Murai, T., Okuda, S., Tanaka, T., & Ohta, H. (2007). Characteristics of object location memory in  
852 mice: Behavioral and pharmacological studies. *Physiology & Behavior*, *90*, 116-124.  
853 doi:10.1016/j.physbeh.2006.09.013
- 854 Ohman, A., & Mineka, S. (2001). Fears, phobias, and preparedness: Toward an evolved module of  
855 fear and fear learning. *Psychological Review*, *108*, 483-522. doi:10.1037//0033-295x.108.3.483

856 Oliveira, A.M.M., Hawk, J.D., Abel, T., & Havekes, R. (2010). Post-training reversible inactivation  
857 of the hippocampus enhances novel object recognition memory. *Learning & Memory*, *17*, 155-  
858 160. doi:10.1101/lm.1625310

859 Pantoja, J., Ribeiro, S., Wiest, M., Soares, E., Gervasoni, D., Lemos, N.A.M., & Nicolelis, M.A.L.  
860 (2007). Neuronal activity in the primary somatosensory thalamocortical loop is modulated by  
861 reward contingency during tactile discrimination. *Journal of Neuroscience*, *27*, 10608-10620.  
862 doi:10.1523/JNEUROSCI.5279-06.2007

863 Pearce, J.M., & Hall, G. (1980). A model for Pavlovian learning: Variations in the effectiveness of  
864 conditioned but not of unconditioned stimuli. *Psychological Review*, *87*, 532-552.  
865 doi:10.1037/0033-295x.87.6.532

866 Pessoa, L. (2009). How do emotion and motivation direct executive control?. *Trends in Cognitive*  
867 *Sciences*, *13*, 160-166. doi:10.1016/j.tics.2009.01.006

868 Piper, B.J., Fraiman, J.B., & Meyer, J.S. (2005). Repeated MDMA ("Ecstasy") exposure in adolescent  
869 male rats alters temperature regulation, spontaneous motor activity, attention, and serotonin  
870 transporter binding. *Developmental Psychobiology*, *47*, 145-157. doi:10.1002/dev.20085

871 Pourtois, G., Schettino, A., & Vuilleumier, P. (2013). Brain mechanisms for emotional influences on  
872 perception and attention: What is magic and what is not. *Biological Psychology*, *92*, 492-512.  
873 doi: 10.1016/j.biopsycho.2012.02.007

874 Pratt, J., & Hommel, B. (2003). Symbolic control of visual attention: The role of working memory  
875 and attentional control settings. *Journal of Experimental Psychology-Human Perception and*  
876 *Performance*, *29*, 835-845. doi:10.1037/0096-1523.29.5.835

877 Qi, S.Q., Zeng, Q.H., Ding, C., & Li, H. (2013). Neural correlates of reward-driven attentional  
878 capture in visual search. *Brain Research*, *1532*, 32-43. doi:10.1016/j.brainres.2013.07.044

879 Rattazzi, L., Cariboni, A., Poojara, R., Shoenfeld, Y., & D'Acquisto, F. (2015). Impaired sense of  
880 smell and altered olfactory system in RAG-1(-/-) immunodeficient mice. *Frontiers in*  
881 *Neuroscience*, *9*, 9. doi:10.3389/fnins.2015.00318

882 Saraiva, L. R., Kondoh, K., Ye, X. L., Yoon, K. H., Hernandez, M., & Buck, L. B. (2016).  
883 Combinatorial effects of odorants on mouse behavior. *Proceedings of the National Academy of*  
884 *Sciences of the United States of America*, *113*, E3300-E3306. doi:10.1073/pnas.1605973113

885 Sarter, M., Givens, B., & Bruno, J.P. (2001). The cognitive neuroscience of sustained attention:  
886 Where top-down meets bottom-up. *Brain Research Reviews*, *35*, 146-160. doi:10.1016/s0165-  
887 0173(01)00044-3

888 Shapiro, K.L., Egerman, B., & Klein, R.M. (1984). Effects of arousal on human visual dominance.  
889 *Perception & Psychophysics*, *35*, 547-552. doi:10.3758/bf03205951

890 Silvers, J.M., Harrod, S.B., Mactutus, C.F., & Booze, R.M. (2007). Automation of the novel object  
891 recognition task for use in adolescent rats. *Journal of Neuroscience Methods*, *166*, 99-103. doi:  
892 10.1016/j.jneumeth.2007.06.032



893 Spence, C. (2010). Crossmodal spatial attention. *Annals of The New York Academy of Sciences*, 1191,  
894 182-200. doi:10.1111/j.1749-6632.2010.05440.x

895 Sutherland, N. S., & Mackintosh, N. J. (1971). *Mechanisms of animal discrimination learning*. New  
896 York, NY: Academic Press

897 Talmi, D. (2013). Enhanced emotional memory: cognitive and neural mechanisms. *Current*  
898 *Directions in Psychological Science*, 22, 430-436. doi:10.1177/0963721413498893

899 Talmi, D., & McGarry, L.M. (2012). Accounting for immediate emotional memory enhancement.  
900 *Journal of Memory and Language*, 66, 93-108. doi:10.1016/j.jml.2011.07.009

901 Talmi, D., Slapkova, M., & Wieser, M. (2018). Testing the possibility of model-based Pavlovian  
902 control on attention to threat. *Journal of Cognitive Neuroscience*, 31, 36-48. doi:  
903 10.1162/jocn\_a\_01329

904 Vermeulen, N., Godefroid, J., & Mermillod, M. (2009). Emotional modulation of attention: Fear  
905 increases but disgust reduces the attentional blink. *Plos One*, 4, 5.  
906 doi:10.1371/journal.pone.0007924

907 Vuilleumier, P. (2005). How brains beware: Neural mechanisms of emotional attention. *Trends in*  
908 *Cognitive Sciences*, 9, 585-594. doi:10.1016/j.tics.2005.10.011

909 Wang, L.H., Duan, Y.Y., Theeuwes, J., & Zhou, X.L. (2014). Reward breaks through the inhibitory  
910 region around attentional focus. *Journal of Vision*, 14, 7. doi:10.1167/14.12.2

911 Wilson, P.N., Boumphrey, P., & Pearce, J.M. (1992). Restoration of the orienting response to a light  
912 by a change in its predictive accuracy. *Quarterly Journal of Experimental Psychology Section*  
913 *B-Comparative and Physiological Psychology*, 44, 17-36. doi:10.1080/02724999208250600

914 Yang, M., & Crawley, J. N. (2009). Simple behavioral assessment of mouse olfaction. *Current*  
915 *protocols in neuroscience*, Chapter 8, Unit 8.24, doi: 10.1002/0471142301.ns0824s48

916 Yantis, S., Schwarzbach, J., Serences, J.T., Carlson, R.L., Steinmetz, M.A., Pekar, J.J., & Courtney,  
917 S.M. (2002). Transient neural activity in human parietal cortex during spatial attention shifts.  
918 *Nature Neuroscience*, 5, 995-1002. doi:10.1038/nn921

919 Zaborszky, L., Gaykema, R.P., Swanson, D.J., & Cullinan, W.E. (1997). Cortical input to the basal  
920 forebrain. *Neuroscience*, 79, 1051-1078. doi:10.1016/s0306-4522(97)00049-3

921 Wentura, D., Muller, P., & Rothermund, K. (2014). Attentional capture by evaluative stimuli: Gain-  
922 and loss-connoting colors boost the additional- singleton effect. *Psychonomic Bulletin &*  
923 *Review*, 21, 701–707. doi:10.3758/s13423-013-0531-z

924  
925
